# Supplementary material for: Hypertension control rate in India: systematic review and meta-analysis of population-level non-interventional studies, 2001–2022
Source: PubMed Central journal article supplement (PMC10305851; doi:10.1016/j.lansea.2022.100113), 2022-11-23
Supplement: mmc1.pdf [file mmc1.pdf]

# Hypertension control rate in India: Systematic review and meta-analysis of population level non-interventional studies, 2001-2022

Shaffi Fazaludeen Koya, DrPH, Zarin Pilakkadavath, DNB, Praseeda Chandran MD et al.

## Supplement files

### S1 Search strategy

#### PubMed

("Hypertension"[Mesh] OR "hypertension"[Text Word] OR "blood pressure"[Text Word] OR "raised blood pressure"[Text Word] OR "elevated blood pressure"[Text Word] OR "systolic blood pressure"[Text Word] OR "diastolic blood pressure"[Text Word] OR "SBP"[Text Word] OR "DBP"[Text Word] OR "isolated systolic blood pressure"[Text Word] OR "high BP"[Text Word] OR "BP"[Text Word] OR "raised BP"[Text Word] OR "elevated BP"[Text Word]) AND ("India"[Text Word] OR "Indian"[Text Word]) AND "control"[Text Word] AND 2001/01/01:2022/09/20[Date - Publication]

#### Web of science

((TI=('hypertension'/exp OR hypertension OR 'blood pressure' OR 'raised blood pressure' OR 'elevated blood pressure' OR 'systolic blood pressure' OR 'diastolic blood pressure' OR 'sbp' OR 'dbp' OR 'isolated systolic blood pressure' OR 'high bp' OR 'bp' OR 'raised bp' OR 'elevated bp' )) AND TI=('indian' OR 'india' )) AND TI=('control') AND ('indian' OR 'india' ) AND ('control')) AND [2001-2022]/py

#### Embase

('hypertension':ab,ti OR hypertension:ab,ti OR 'blood pressure':ab,ti OR 'raised blood pressure':ab,ti OR 'elevated blood pressure':ab,ti OR 'systolic blood pressure':ab,ti OR 'diastolic blood pressure':ab,ti OR 'sbp':ab,ti OR 'dbp':ab,ti OR 'isolated systolic blood pressure':ab,ti OR 'high bp':ab,ti OR 'bp':ab,ti OR 'raised bp':ab,ti OR 'elevated bp':ab,ti) AND ('indian':ab,ti OR india:ab,ti) AND 'control':ab,ti AND (2001:py OR 2002:py OR 2003:py OR 2004:py OR 2005:py OR 2006:py OR 2007:py OR 2008:py OR 2009:py OR 2010:py OR 2011:py OR 2012:py OR 2013:py OR 2014:py OR 2015:py OR 2016:py OR 2017:py OR 2018:py OR 2019:py OR 2020:py OR 2021:py OR 2022:py) AND [embase]/lim NOT ([embase]/lim AND [medline]/lim)

**S2—A Studies included in the systematic review (n= 51): Key variables extracted**

| Sl. No | Author; Year     | Study Year | Study Design | State | Region | Area | Sex | Sampling Design | Age Groups | HTN Prev: % | Known Prev: % | HTN Prev: Sex | HTN Prev: Area | Control Rate: % | Male Control Rate: % | Female Control Rate: % |
|--------|------------------|------------|--------------|-------|--------|------|-----|-----------------|------------|-------------|---------------|---------------|----------------|-----------------|----------------------|------------------------|
| 1      | Amarchand;2022   | 2017       | C/S          | AI    | MR     | U/R  | M/F | SyRS            | 18-69      | 28.5        | 27.8          | M>F           | U>R            | 12.6            | 10.3                 | 15.3                   |
| 2      | Anupama;2017     | 2015       | C/S          | KT    | S      | R    | M/F | Cl/S            | adults     | 30.4        | 27.4          | F=M           | UA/NA          | 4               | UA/NA                | UA/NA                  |
| 3      | Banerjee;2016    | 2015       | C/S          | WB    | E      | U    | M/F | SRS             | adults     | 42          | 54.4          | M>F           | UA/NA          | 11.6            | 9.7                  | 13.1                   |
| 4      | Begam;2016       | 2013       | C/S          | KL    | S      | R    | M   | SyRS            | adults     | 45          | 48            | UA/NA         | UA/NA          | 24.3            | 24.3                 | UA/NA                  |
| 5      | Bhardwaj;2010    | 2009       | C/S          | HP    | N      | R    | M/F | Cl/S            | adults     | 35.9        | 21.4          | M>F           | UA/NA          | 4.3             | UA/NA                | UA/NA                  |
| 6      | Bharucha;2003    | 2001       | C/S          | MH    | W      | U    | M/F | Cl/S            | adults     | 36.4        | 52.3          | UA/NA         | UA/NA          | 7.3             | 5.6                  | 8.5                    |
| 7      | Bhatia;2021      | 2017       | C/S          | AI    | MR     | U/R  | M/F | SyRS            | 45+        | 27.4        | 73            | UA/NA         | UA/NA          | 7.3             | UA/NA                | UA/NA                  |
| 8      | Busingye;2017    | 2014       | C/S          | AP    | S      | R    | M/F | SyRS            | adults     | ##          | 42.6          | M>F           | UA/NA          | 26.7            | 25.7                 | 28                     |
| 9      | Cao;2021         | 2013       | C/S          | KL    | S      | R    | M/F | Cl/S            | 30+        | 27.3        | 54.4          | M>F           | UA/NA          | 36.4            | 26.9                 | 54.7                   |
| 10     | Chacko;2020      | 2019       | C/S          | KL    | S      | U/R  | M/F | Cl/S            | adults     | ##          | NA            | UA/NA         | UA/NA          | 38.4            | 41                   | 36.7                   |
| 11     | Chaturvedi;2007a | 2006       | C/S          | DL    | N      | U/R  | M/F | Cl/S            | adults     | 27.5        | 53.3          | F=M           | UA/NA          | 10.5            | 6.7                  | 14                     |
| 12     | Chaturvedi;2007b | 2006       | C/S          | DL    | N      | U/R  | M/F | Cl/S            | elderly    | 63.8        | 54            | F=M           | UA/NA          | 8.5             | 8.9                  | 8                      |
| 13     | Dandge;2019      | 2017       | C/S          | TL    | S      | R    | M/F | SRS             | adults     | 23.6        | 61            | M>F           | UA/NA          | 28.6            | UA/NA                | UA/NA                  |
| 14     | Gabert;2017      | 2013       | C/S          | **    | MR     | U/R  | M/F | SyRS            | 15+        | 32.2        | 37.4          | F>M           | UA/NA          | 15.3            | UA/NA                | UA/NA                  |
| 15     | Garc;2022        | 2007       | C/S          | AI    | MR     | U/R  | M/F | NM              | 60+        | 41.4        | 46.1          | UA/NA         | UA/NA          | 21.5            | UA/NA                | UA/NA                  |
| 16     | Geevar;2022      | 2011       | C/S          | KL    | S      | U/R  | M/F | SRS             | 20-39      | 12.3        | 34.7          | M>F           | U>R            | 17.3            | 2.5                  | 1.9                    |
| 17     | Godara;2021      | 2019       | C/S          | RJ    | N      | R    | M/F | Cl/S            | 30+        | 22          | 27.3          | M>F           | UA/NA          | 9.1             | 6.4                  | 15.8                   |
| 18     | Goswami;2016     | 2015       | C/S          | DL    | N      | U    | M/F | Cl/S            | elderly    | 67.2        | 41.3          | F>M           | UA/NA          | 13.6            | 7.2                  | 18                     |
| 19     | Gupta;2012       | 2007       | C/S          | AI    | MR     | U/R  | F   | SyRS            | adults     | 39.2        | 43.5          | UA/NA         | U>R            | 18.3            | UA/NA                | 18.3                   |
| 20     | Gupta;2013       | 2010       | C/S          | **    | MR     | U    | M/F | Cl/S            | adults     | 42.8        | 57            | M>F           | UA/NA          | 25.2            | 24.4                 | 26.3                   |
| 21     | Gupta;2014       | 2010       | C/S          | **    | MR     | U    | M/F | Cl/S            | adults     | 31.3        | 55.3          | F>M           | UA/NA          | 15.8            | 13.7                 | 18.1                   |
| 22     | Gupta;2020       | 2018       | C/S          | HR    | W      | R    | M/F | SRS             | elderly    | 50.3        | 58.8          | F=M           | UA/NA          | 13.9            | 12.2                 | 15                     |
| 23     | Hazarika;2004    | 2003       | C/S          | AS    | E      | R    | M/F | SRS             | adults     | 33.3        | 21.6          | F=M           | UA/NA          | 3.9             | 3.6                  | 4.1                    |
| 24     | Kanungo;2017     | 2014       | C/S          | WB    | E      | U/R  | M/F | SyRS            | adults     | 26          | 16.1          | M>F           | U>R            | 4.5             | UA/NA                | UA/NA                  |
| 25     | Kapoor;2021      | 2020       | C/S          | **    | N      | U/R  | M/F | NM              | 50+        | ##          | ##            | UA/NA         | UA/NA          | 53.8            | 49.9                 | 56.8                   |
| 26     | Karmakar;2018    | 2014       | C/S          | WB    | E      | R    | M/F | SyRS            | adults     | 26.1        | 48.2          | F>M           | UA/NA          | 8.8             | 10.4                 | 7.8                    |
| 27     | Kaur;2012        | 2007       | C/S          | TN    | S      | R    | M/F | SRS             | adults     | 21.5        | 25.1          | F=M           | UA/NA          | 6.6             | 6.1                  | 7.1                    |
| 28     | Kaur;2016        | 2009       | C            | TN    | S      | R    | M/F | SRS             | adults     | 22.9        | 24.5          | UA/NA         | UA/NA          | 10.5            | UA/NA                | UA/NA                  |
| 29     | Kharat;2021      | 2019       | C/S          | PO    | S      | U    | M/F | SyRS            | adults     | ##          | ##            | UA/NA         | UA/NA          | 57.4            | 51                   | 62                     |
| 30     | Kusuma;2013      | 2007       | C/S          | DL    | N      | U    | M/F | Cl/S            | adults     | 18.3        | 41            | M>F           | UA/NA          | 6               | 0                    | 13.5                   |
| 31     | Lee;2022         | 2017       | C/S          | **    | MR     | U/R  | M/F | SyRS            | 45+        | 45.9        | 58.2          | nd            | R=U            | 31.6            | 12.8                 | 18                     |

| Sl. No | Author; Year    | Study Year | Study Design | State | Region | Area | Sex | Sampling Design | Age Groups | HTN Prev: % | Known Prev: % | HTN Prev: Sex | HTN Prev: Area | Control Rate: % | Male Control Rate: % | Female Control Rate: % |
|--------|-----------------|------------|--------------|-------|--------|------|-----|-----------------|------------|-------------|---------------|---------------|----------------|-----------------|----------------------|------------------------|
| 32     | Mallik;2014     | 2011       | C/S          | WB    | E      | R    | M/F | Cl/S            | adults     | 41.9        | 40.1          | UA/NA         | UA/NA          | 10.5            | UA/NA                | UA/NA                  |
| 33     | Mini;2020       | 2018       | C/S          | KL    | S      | U/R  | M/F | SyRS            | adults     | 14.6        | 61.9          | M>F           | UA/NA          | 34.1            | 22                   | 39.1                   |
| 34     | Misra;2014      | 2011       | C/S          | AS    | E      | R    | M/F | Cl/S            | adults     | 26          | 23.5          | F=M           | UA/NA          | 2.4             | UA/NA                | UA/NA                  |
| 35     | Mohan;2007      | 2006       | C/S          | TN    | S      | U    | M/F | SyRS            | adults     | 20          | 32.8          | M>F           | UA/NA          | 10.7            | UA/NA                | UA/NA                  |
| 36     | Moser;2014      | 2007       | C/S          | KL    | S      | U/R  | M/F | Cl/S            | adults     | 32          | 41.1          | F>M           | U>R            | 17.5            | 14.2                 | 19.8                   |
| 37     | Patil;2021      | 2019       | C/S          | AI    | MR     | U/R  | M/F | SRS             | adults     | 29.4        | 43.8          | UA/NA         | UA/NA          | 23.3            | UA/NA                | UA/NA                  |
| 38     | Prayag;2017     | 2015       | C/S          | KT    | S      | U    | M/F | SyRS            | adults     | 38.3        | 53            | F>M           | UA/NA          | 26.1            | UA/NA                | UA/NA                  |
| 39     | Prenissl;2019   | 2016       | C/S          | AI    | MR     | U/R  | M/F | Cl/S            | 15+        | 17.8        | 44.7          | M>F           | U>R            | 7.9             | 5.3                  | 10.9                   |
| 40     | Ragavan;2021    | 2014       | C/S          | **    | S      | R    | M/F | SyRS            | adults     | 29.6        | 64.2          | F>M           | UA/NA          | 39.3            | UA/NA                | UA/NA                  |
| 41     | Reddy;2018      | 2017       | C/S          | TL    | S      | U    | M/F | SRS             | elderly    | 83.5        | 80.8          | F>M           | UA/NA          | 28.7            | UA/NA                | UA/NA                  |
| 42     | Roy;2017        | 2012       | C/S          | DL    | N      | U/R  | M/F | Cl/S            | adults     | 35.7        | 38.7          | M>F           | U>R            | 12.8            | 7                    | 18.6                   |
| 43     | Sandhya;2018    | 2014       | C/S          | KL    | S      | R    | F   | SyRS            | adults     | 32.1        | 67.7          | UA/NA         | UA/NA          | 29.1            | UA/NA                | 29.1                   |
| 44     | Sathish;2012    | 2006       | C            | KL    | S      | R    | M/F | SyRS            | 15+        | 21.4        | ##            | M>F           | UA/NA          | 2.9             | UA/NA                | UA/NA                  |
| 45     | Saxena;2021     | 2018       | C/S          | UK    | N      | R    | M/F | SyRS            | adults     | 39          | 43.5          | M>F           | UA/NA          | 13.8            | 7.6                  | 20.6                   |
| 46     | Thakur;2022     | 2014       | C/S          | PB    | N      | U/R  | M/F | SyRS            | 18-69      | 40.3        | 48.3          | M>F           | R>U            | 18.4            | 9.1                  | 25.3                   |
| 47     | Thakur;2022     | 2016       | C/S          | HR    | N      | U/R  | M/F | SyRS            | 18-69      | 26.2        | 33.3          | M>F           | U>R            | 12              | 9.8                  | 14.4                   |
| 48     | Thankappan;2006 | 2001       | C/S          | KL    | S      | R    | M/F | Cl/S            | adults     | 36.7        | 24.4          | F>M           | UA/NA          | 6.4             | 4.6                  | 7.6                    |
| 49     | Tripathy;2017   | 2015       | C/S          | PB    | W      | U/R  | M/F | SyRS            | adults     | 40.1        | 30.1          | M>F           | R=U            | 18.4            | 9.1                  | 29.1                   |
| 50     | Veena;2019      | 2017       | C/S          | PO    | S      | U    | M/F | Cl/S            | adults     | ##          | ##            | UA/NA         | UA/NA          | 43.9            | UA/NA                | UA/NA                  |
| 51     | Yadav;2008      | 2007       | C/S          | DL    | N      | U    | M/F | SRS             | elderly    | 39.5        | 51.7          | M>F           | UA/NA          | 14.7            | UA/NA                | UA/NA                  |

Note: HTN: Hypertension, Prev: Prevalence, C/S: Cross-sectional, C: Cohort, S: South, N: North, E: East, W: West, MR- Multiple regions, R: Rural, U: Urban, U/R: Urban and rural, M: Male, F: Female, M/F: Males and Females, Cl/S: Cluster sampling, SRS: Simple random sampling, SyRS: Systematic random sampling, UA: Data unavailable, NA: Not applicable, F↓: Females have poorer control rate, M↓: Males have poorer control rate, nd: No difference, ##: Only hypertensive patients included in the study, Elderly: 65 and above, AP: Andhra Pradesh, AS: Assam, DL: Delhi, TL: Telangana, WB: West Bengal, HP: Himachal Pradesh, UK: Uttarakhand, MH: Maharashtra, TN: Tamil Nadu, KT: Karnataka, HR: Haryana, PB: Punjab, PO: Pondicherry, AI: All India, \*\*: Multiple states

S2—B

Map showing the distribution of studies on hypertension control rate, 2001-2022

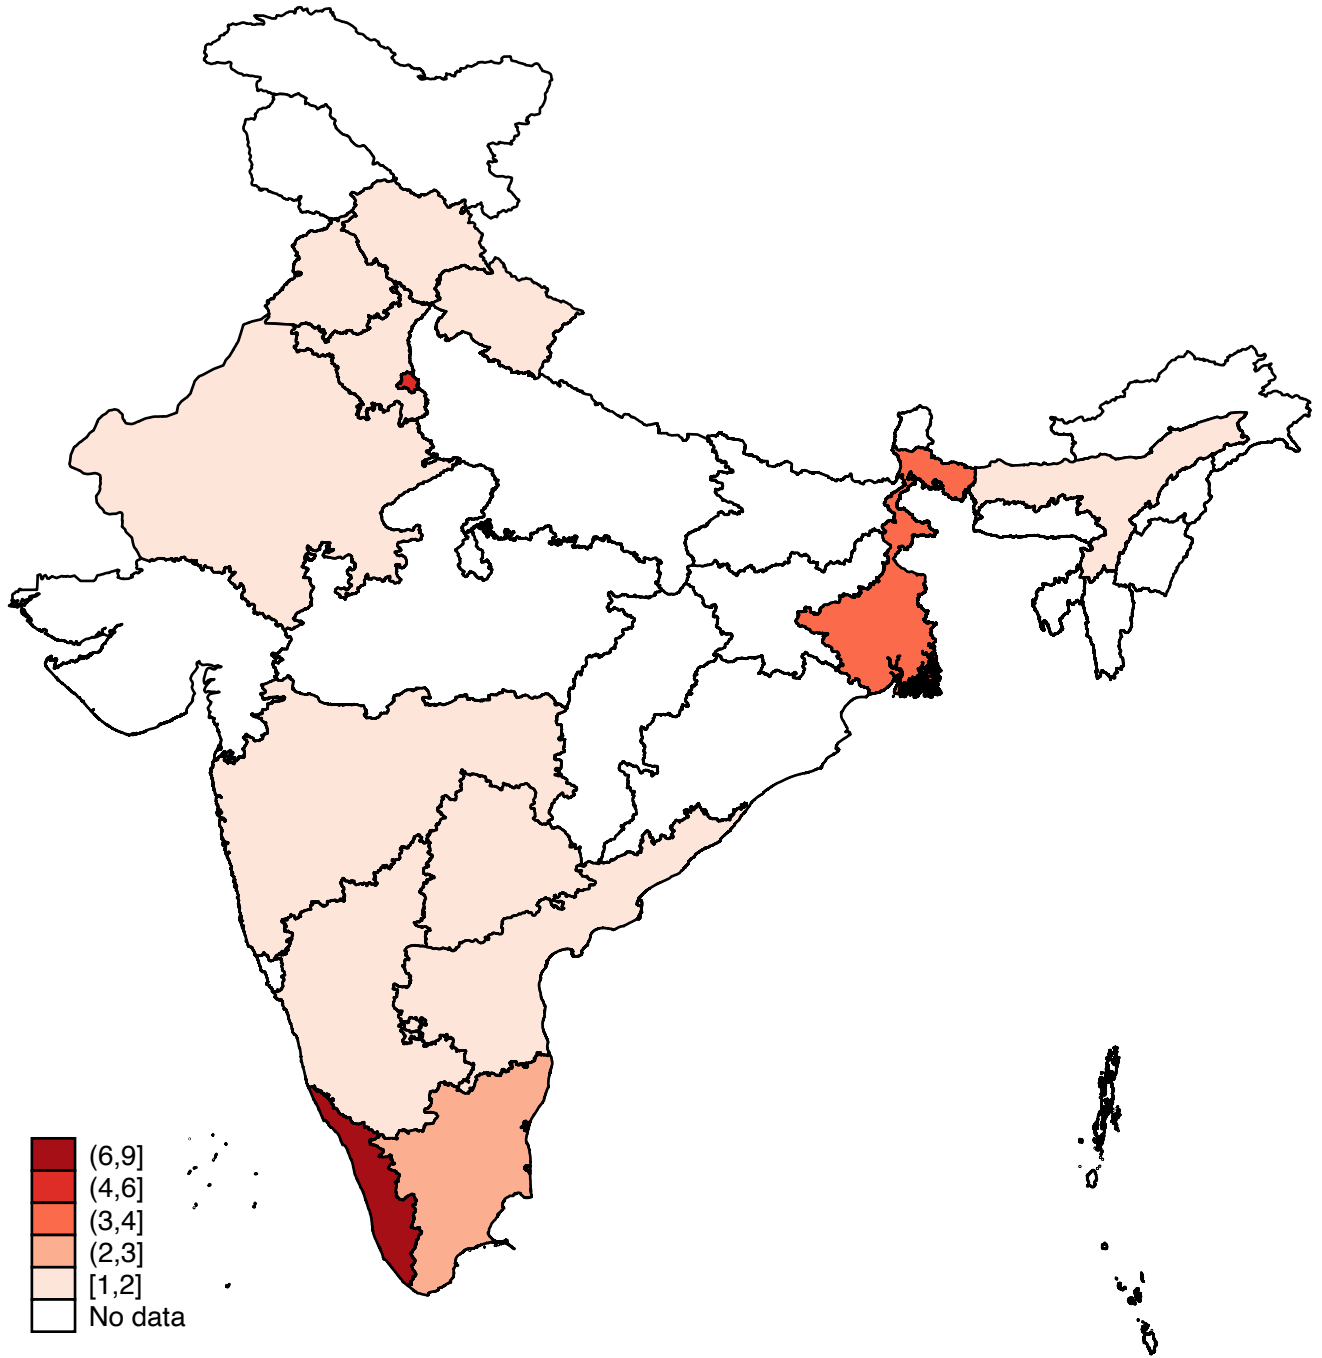



**S2—C Blood pressure measurement details from studies included in the systematic review (n= 51)**

| <b>Author; Year</b> | <b>Number of Measurements</b> | <b>Device Details</b>                                                                | <b>Wait Time</b> | <b>Sitting Arrangement</b> | <b>Interval Between Measurement</b> |
|---------------------|-------------------------------|--------------------------------------------------------------------------------------|------------------|----------------------------|-------------------------------------|
| Amarchand;2022      | 3                             | Automatic BP machines (OMRON HEM-7120, Omron Corporation, Kyoto, Japan)              | not mentioned    | sitting                    | 5 minutes                           |
| Anupama;2017        | 2                             | mercury sphygmomanometers (Diamond, Pune, India)                                     | not mentioned    | sitting                    | 5 minutes                           |
| Banerjee;2016       | 2                             | aneroid sphygmomanometers                                                            | not mentioned    | not mentioned              | 2 minutes                           |
| Begam;2016          | 3                             | automatic Omron BP apparatus (OMRON-4, Omron Corporation, Kyoto, Japan)              | not mentioned    | not mentioned              | 3 minutes                           |
| Bhardwaj;2010       | 2                             | mercury sphygmomanometer                                                             | not mentioned    | not mentioned              | 5 minutes                           |
| Bharucha;2003       | 2                             | Hawksley random zero Sphygmomanometer                                                | not mentioned    | sitting                    | 5 minutes                           |
| Bhatia;2021         | 2                             | not mentioned                                                                        | not mentioned    | not mentioned              | not mentioned                       |
| Busingye;2017       | 3                             | Digital automatic BP monitor (OMRON HEM-907, OMRON Healthcare Company, Kyoto, Japan) | 15 minutes       | sitting                    | 3 minutes                           |
| Cao;2021            | 3                             | Omron automatic BP monitor (model IA2)                                               | not mentioned    | not mentioned              | 3 minutes                           |
| Chacko;2020         | 3                             | digital sphygmomanometer (OMRON HEM-7121)                                            | not mentioned    | sitting                    | 3 minutes                           |
| Chaturvedi;2007a    | 3                             | mercury sphygmomanometer                                                             | not mentioned    | sitting                    | 2 minutes                           |

| <b>Author; Year</b> | <b>Number of Measurements</b> | <b>Device Details</b>                                                                    | <b>Wait Time</b> | <b>Sitting Arrangement</b> | <b>Interval Between Measurement</b> |
|---------------------|-------------------------------|------------------------------------------------------------------------------------------|------------------|----------------------------|-------------------------------------|
| Chaturvedi;2007b    | 3                             | mercury sphygmomanometer                                                                 | not mentioned    | sitting                    | 2 minutes                           |
| Dandge;2019         | 3                             | Rossmax (model MJ701f) automated sphygmomanometer                                        | not mentioned    | sitting                    | 1 minute                            |
| Gabert;2017         | not mentioned                 | a digital sphygmomanometer                                                               | not mentioned    | not mentioned              | not mentioned                       |
| Garc;2022           | 3                             | not mentioned                                                                            | not mentioned    | not mentioned              | not mentioned                       |
| Geevar;2022         | 3                             | electronic BP apparatus (model 1A2, Omron Corporation, Shimogyo-ku, Kyoto, Japan)        | 15 minutes       | sitting                    | 3 minutes                           |
| Godara;2021         | 3                             | not mentioned                                                                            | not mentioned    | not mentioned              | not mentioned                       |
| Goswami;2016        | 2                             | digital sphygmomanometer (Omron automatic blood pressure monitor, model HEM-7130)        | not mentioned    | sitting                    | 5 minutes                           |
| Gupta;2012          | 3                             | digital sphygmomanometer supplied centrally (Omron model SDX, Omron Inc., USA)           | 5 minutes        | sitting                    | 2 minutes                           |
| Gupta;2013          | 3                             | Omron SDX instruments (Omron Healthcare, Lake Forest, IL)                                | not mentioned    | sitting                    | 5 minutes                           |
| Gupta;2014          | 3                             | standardized instrument                                                                  | 9 minutes        | sitting                    | not mentioned                       |
| Gupta;2020          | 2                             | digital blood pressure machine (Omron automatic blood pressure monitor, model: HEM-7120) | 30 minutes       | sitting                    | 5 minutes                           |

| <b>Author; Year</b> | <b>Number of Measurements</b> | <b>Device Details</b>                                                                                  | <b>Wait Time</b> | <b>Sitting Arrangement</b> | <b>Interval Between Measurement</b> |
|---------------------|-------------------------------|--------------------------------------------------------------------------------------------------------|------------------|----------------------------|-------------------------------------|
| Hazarika;2004       | 3                             | mercury column sphygmomanometer                                                                        | 15 minutes       | sitting                    | 10 to 15 minutes                    |
| Kanungo;2017        | 2                             | Rossmax – AW150 Blood Pressure Monitor (Rossmax International Ltd., Berneck, Switzerland)              | not mentioned    | not mentioned              | 10 minutes                          |
| Kapoor;2021         | 3                             | aneroid sphygmomanometer.                                                                              | 15 minutes       | sitting                    | not mentioned                       |
| Karmakar;2018       | not mentioned                 | not mentioned                                                                                          | not mentioned    | not mentioned              | not mentioned                       |
| Kaur;2012           | 2                             | electronic automatic blood pressure apparatus (Omron MX3)                                              | 5 minutes        | sitting                    | 5 minutes                           |
| Kaur;2016           | 2                             | electronic automatic BP apparatus (Omron MX3)                                                          | 10 minutes       | sitting                    | not mentioned                       |
| Kharat;2021         | 3                             | not described                                                                                          | not mentioned    | not mentioned              | not mentioned                       |
| Kusuma;2013         | 3                             | mercury column sphygmomanometer                                                                        | not mentioned    | sitting                    | not mentioned                       |
| Lee;2022            | 3                             | Omron automatic BP monitor                                                                             | not mentioned    | not mentioned              | not mentioned                       |
| Mallik;2014         | 3                             | mercury sphygmomanometer                                                                               | 5 minutes        | sitting                    | 5 minutes                           |
| Mini;2020           | 3                             | digital Omron blood pressure apparatus (OMRON-4, Omron Corporation, Kyoto, Japan)                      | 11 minutes       | sitting                    | not mentioned                       |
| Misra;2014          | 3                             | Omron digital automatic blood pressure monitor three times (OMRON -4, Omron Corporation, Kyoto, Japan) | not mentioned    | sitting                    | not mentioned                       |

| <b>Author; Year</b> | <b>Number of Measurements</b> | <b>Device Details</b>                                                                | <b>Wait Time</b> | <b>Sitting Arrangement</b> | <b>Interval Between Measurement</b> |
|---------------------|-------------------------------|--------------------------------------------------------------------------------------|------------------|----------------------------|-------------------------------------|
| Mohan;2007          | not mentioned                 | not mentioned                                                                        | not mentioned    | not mentioned              | not mentioned                       |
| Moser;2014          | 3                             | Boso Medistar Wrist Blood Pressure Monitor Model S                                   | not mentioned    | sitting                    | 1 minute                            |
| Patil;2021          | 3                             | not mentioned                                                                        | not mentioned    | not mentioned              | not mentioned                       |
| Prayag;2017         | 2                             | mercury sphygmomanometer                                                             | 10 minutes       | sitting                    | 5 minutes                           |
| Prenissl;2019       | 3                             | portable Omron BP monitor, model HEM-8712)                                           | 5 minutes        | sitting                    | 5 minutes                           |
| Ragavan;2021        | 3                             | digital automatic BP monitor (OMRON HEM-907, OMRON Healthcare Company, Kyoto, Japan) | 15 minutes       | sitting                    | 3 minutes                           |
| Reddy;2018          | 3                             | electronic sphygmomanometer (OMRON HEM 7120, Omron Healthcare Co., Ltd., Japan)      | 30 minutes       | sitting                    | 1 minute                            |
| Roy;2017            | 2                             | automated blood pressure machine (OMRON (HEM-7080)                                   | not mentioned    | sitting                    | 2 minutes                           |
| Sandhya;2018        | not mentioned                 | not mentioned                                                                        | not mentioned    | not mentioned              | not mentioned                       |
| Sathish;2012        | 2                             | OMRON digital automatic BP monitor (OMRON-4, Omron Corporation, Kyoto, Japan         | 12 minutes       | sitting                    | not mentioned                       |
| Saxena;2021         | 2                             | Omron digital Blood pressure instrument                                              | 6 minutes        | sitting                    | 3 minutes                           |

| <b>Author; Year</b> | <b>Number of Measurements</b> | <b>Device Details</b>                                                  | <b>Wait Time</b> | <b>Sitting Arrangement</b> | <b>Interval Between Measurement</b> |
|---------------------|-------------------------------|------------------------------------------------------------------------|------------------|----------------------------|-------------------------------------|
| Thakur;2022         | 2                             | calibrated electronic equipment (OMRON HEM 7120)                       | not mentioned    | not mentioned              | 2 minutes                           |
| Thakur;2022         | 2                             | calibrated electronic equipment (OMRON HEM 7120)                       | not mentioned    | not mentioned              | 2 minutes                           |
| Thankappan;2006     | 2                             | not mentioned                                                          | not mentioned    | not mentioned              | 10 minutes                          |
| Tripathy;2017       | 3                             | electronic equipment (OMRON HEM 7120, Omron Corporation, Kyoto, Japan) | 7 minutes        | sitting                    | 3 minutes                           |
| Veena;2019          | 2                             | OMRON HEM-7120-IN validated automated BP measuring device              | not mentioned    | not mentioned              | not mentioned                       |
| Yadav;2008          | 2                             | mercury sphygmomanometer                                               | 8 minutes        | sitting                    | one week                            |

**S3 Criteria used for SIGN50 score- level of evidence<sup>1</sup>**

| <b>Score</b> | <b>Quality/bias</b> | <b>Criteria</b>                                                                                                                                 |
|--------------|---------------------|-------------------------------------------------------------------------------------------------------------------------------------------------|
| LE2++        | High quality        | High-quality case–control or cohort studies with a very low risk of confounding or bias and a high probability that the relationship is causal  |
|              |                     | High-quality cross-sectional studies with statistical analysis and very low risk of bias                                                        |
| LE2+         | Low risk of bias    | Well-conducted case–control or cohort studies with a low risk of confounding or bias and a moderate probability that the relationship is causal |
|              |                     | Well-conducted cross-sectional studies with statistical analysis and low risk of bias                                                           |
| LE2          | High risk of bias   | Case–control or cohort studies with a high risk of confounding or bias and a significant risk that the relationship is not causal               |
|              |                     | Cross-sectional studies with statistical analysis and a high risk of bias                                                                       |
| LE3          | High risk of bias   | Cross-sectional studies without any statistical analysis                                                                                        |

<sup>1</sup>de Winter CF, Jansen AAC, Evenhuis HM. Physical conditions and challenging behaviour in people with intellectual disability: a systematic review. *Journal of Intellectual Disability Research*. 2011;55(7):675-698. doi:10.1111/j.1365-2788.2011.01390.x

S4 Forest plot of the initial pooled analysis with 47 studies.

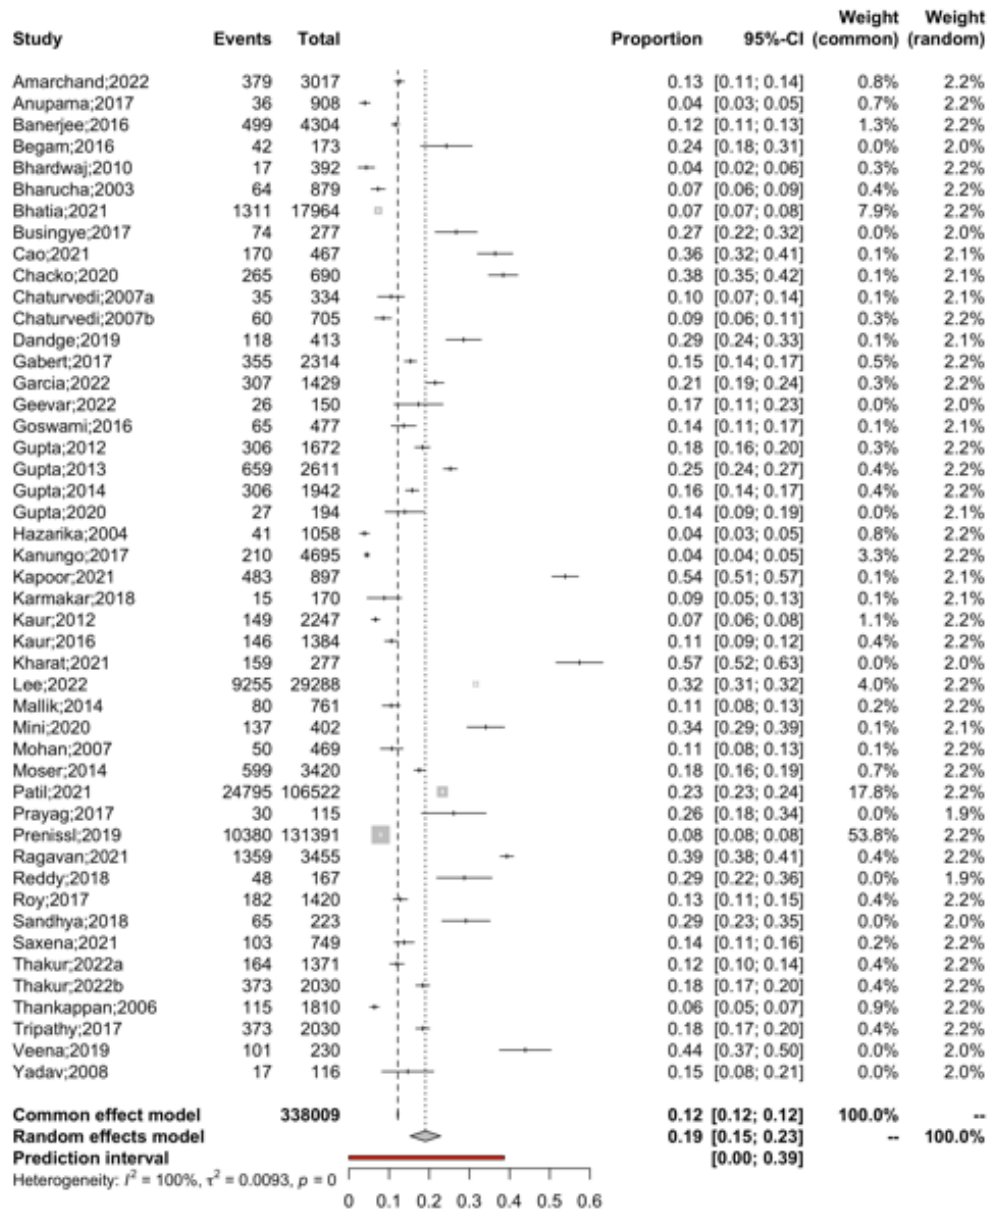

S5—A

Diagnostic Bajout plot

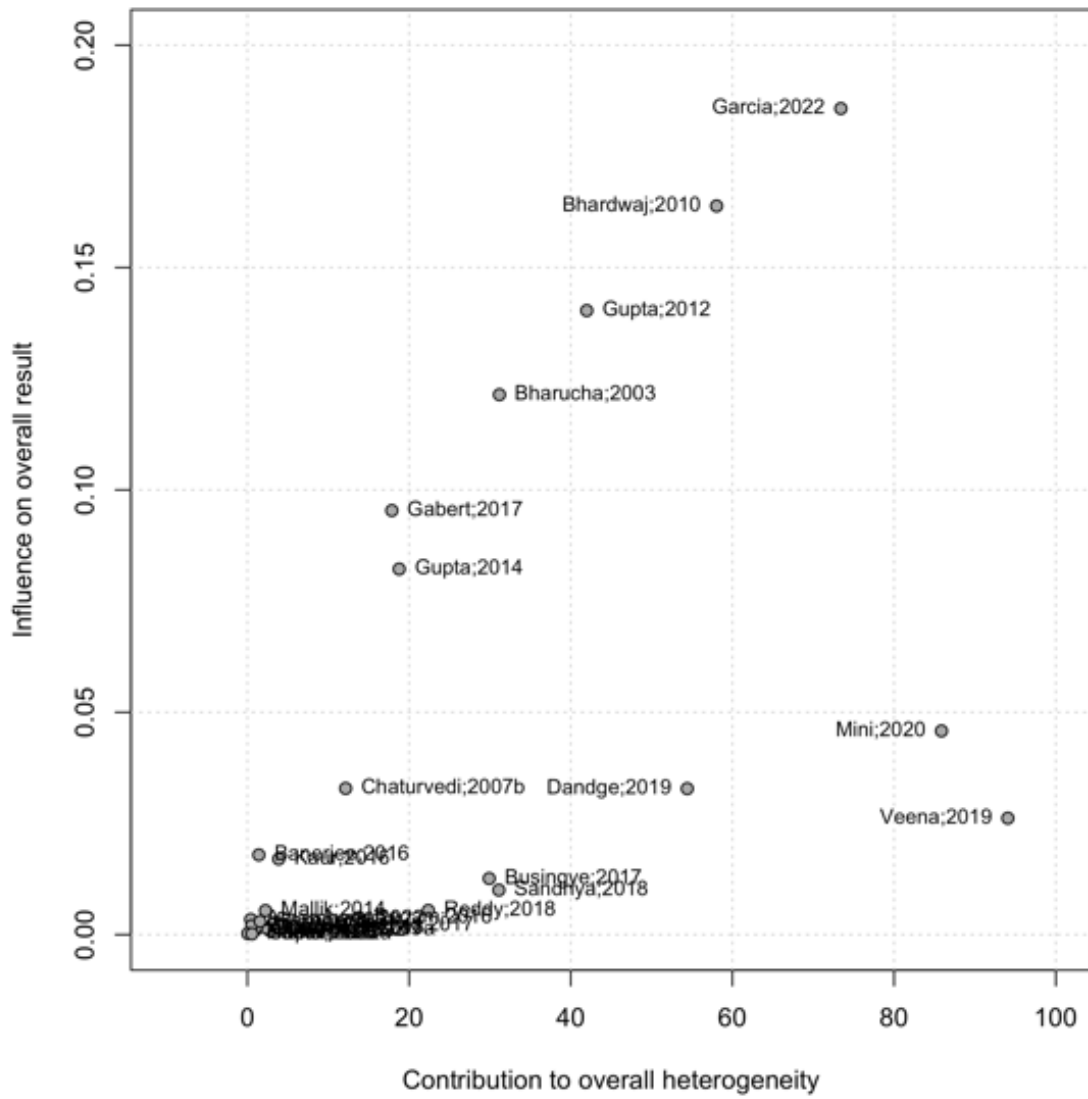



# S5—B Test of residual

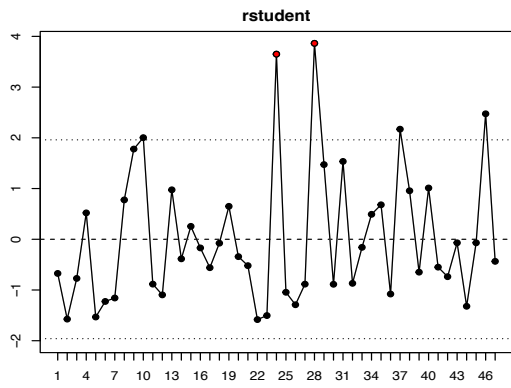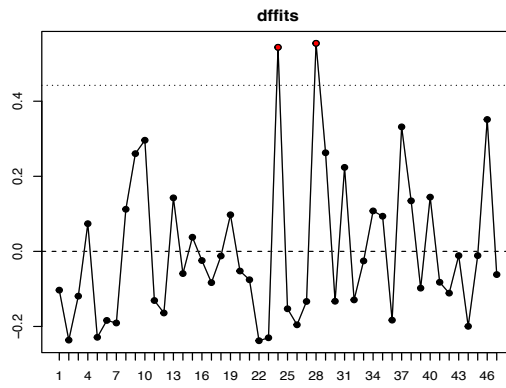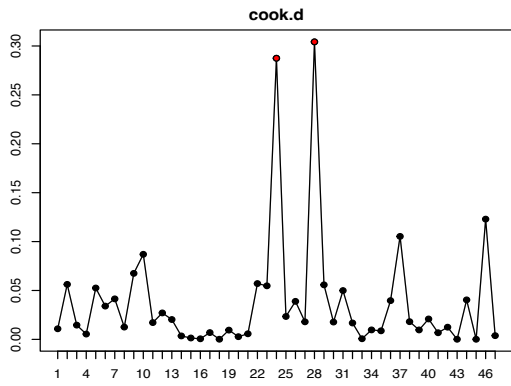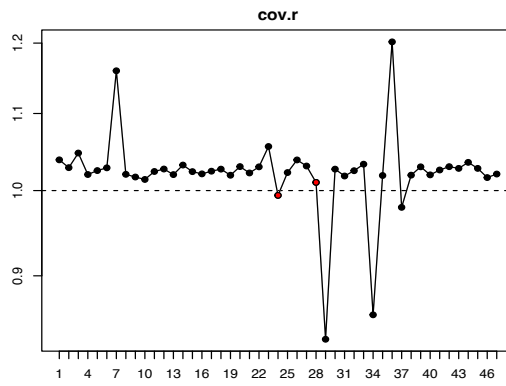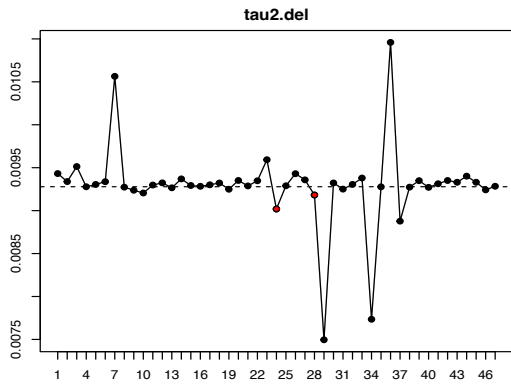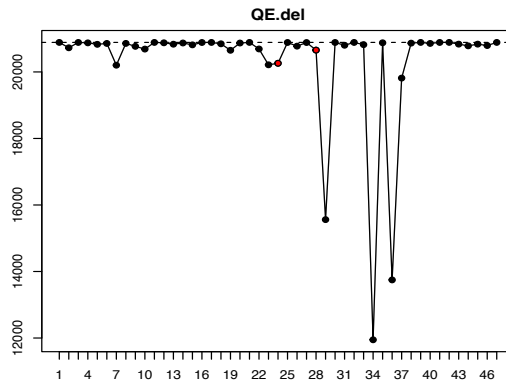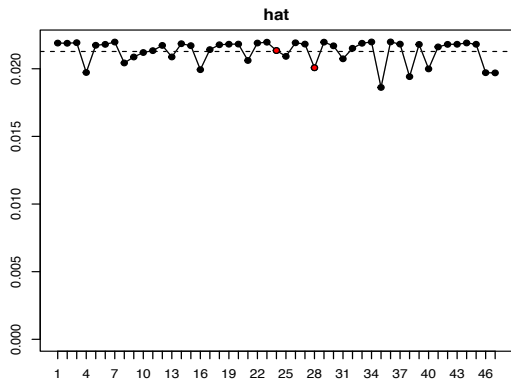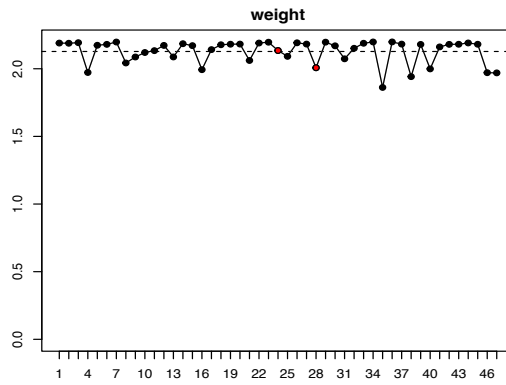

## S6 Forest plot of leave-one-out analysis

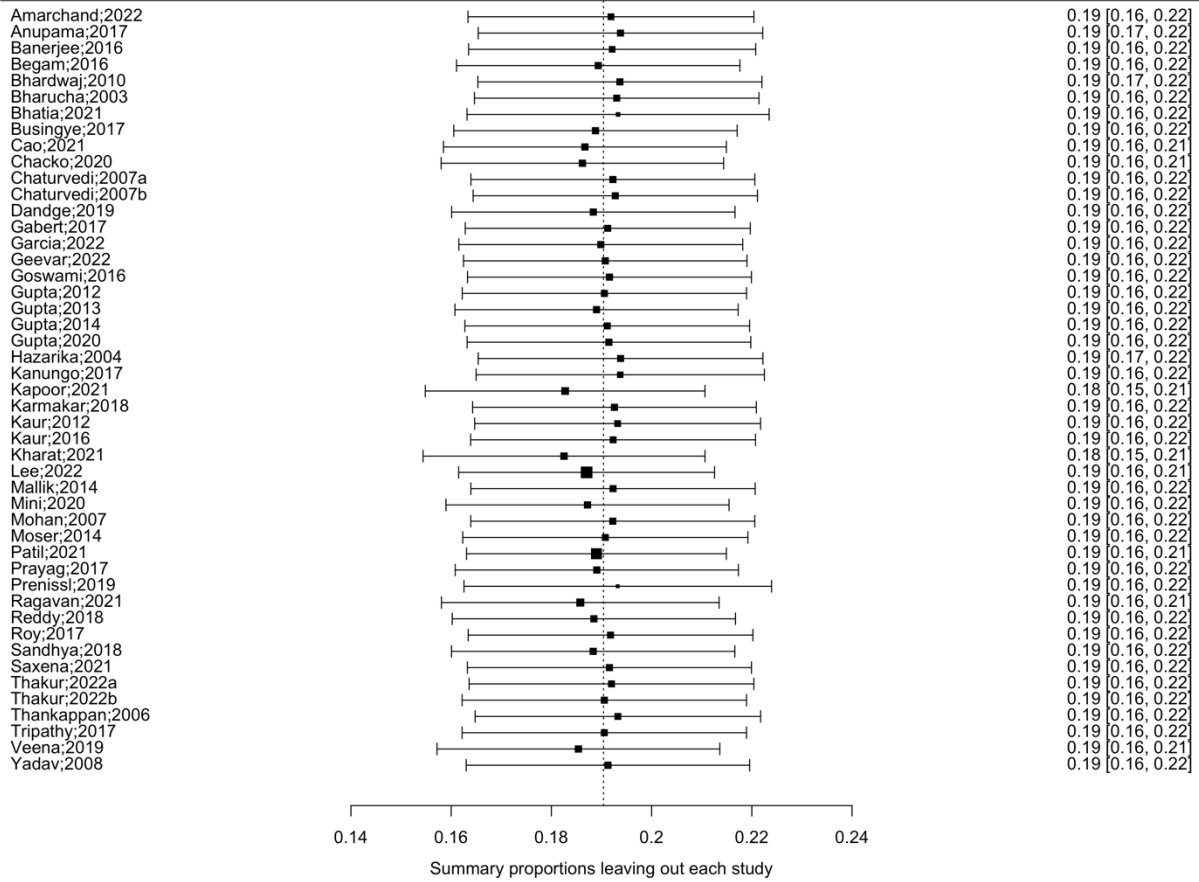

**S7 Risk of bias assessment using validated tool by Hoy et al. and summary of level of evidence using SIGN50**

| Study           | Was the study's target population a close representation of the national population ? | Was the sampling frame a true or close representation of the target population ? | Was random selection used OR, a census used? | Was the likelihood of non-response bias minimal ? | Were data collected directly from the subjects ? | Was an acceptable case definition used? | Was the study instrument shown to have reliability and validity? | Was the same mode of data collection used for all subjects? | Was the length of the shortest prevalence period appropriate? | Were the numerator and denominator appropriate? | Summary item on the overall risk of study bias? <sup>1</sup> | SIGN 50 score <sup>2</sup> |
|-----------------|---------------------------------------------------------------------------------------|----------------------------------------------------------------------------------|----------------------------------------------|---------------------------------------------------|--------------------------------------------------|-----------------------------------------|------------------------------------------------------------------|-------------------------------------------------------------|---------------------------------------------------------------|-------------------------------------------------|--------------------------------------------------------------|----------------------------|
| Amarchand;2022  | Low                                                                                   | Low                                                                              | Low                                          | Low                                               | Low                                              | Low                                     | Low                                                              | Low                                                         | Low                                                           | Low                                             | Low                                                          | LE2++                      |
| Anupama;2017    | High                                                                                  | Low                                                                              | Low                                          | Low                                               | Low                                              | Low                                     | Low                                                              | Low                                                         | Low                                                           | Low                                             | Low                                                          | LE2++                      |
| Banerjee;2016   | High                                                                                  | Low                                                                              | Low                                          | Low                                               | Low                                              | Low                                     | Low                                                              | Low                                                         | Low                                                           | Low                                             | Low                                                          | LE2++                      |
| Begam;2016      | High                                                                                  | Low                                                                              | Low                                          | Low                                               | Low                                              | Low                                     | Low                                                              | Low                                                         | Low                                                           | Low                                             | Low                                                          | LE2++                      |
| Bhardwaj;2010   | High                                                                                  | Low                                                                              | Low                                          | Low                                               | Low                                              | Low                                     | Low                                                              | Low                                                         | Low                                                           | Low                                             | Low                                                          | LE2++                      |
| Bharucha;2003   | High                                                                                  | Low                                                                              | Low                                          | Low                                               | Low                                              | Low                                     | Low                                                              | Low                                                         | Low                                                           | Low                                             | Low                                                          | LE2++                      |
| Bhatia;2021     | Low                                                                                   | Low                                                                              | Low                                          | High                                              | Low                                              | Low                                     | Low                                                              | Low                                                         | Low                                                           | Low                                             | Low                                                          | LE2++                      |
| Busingye;2017   | High                                                                                  | Low                                                                              | Low                                          | High                                              | Low                                              | Low                                     | Low                                                              | Low                                                         | Low                                                           | Low                                             | Moderate                                                     | LE2++                      |
| Cao;2021        | High                                                                                  | Low                                                                              | Low                                          | Low                                               | Low                                              | Low                                     | Low                                                              | Low                                                         | Low                                                           | Low                                             | Low                                                          | LE2++                      |
| Chacko;2020     | High                                                                                  | Low                                                                              | Low                                          | Low                                               | Low                                              | Low                                     | Low                                                              | Low                                                         | Low                                                           | Low                                             | Low                                                          | LE2++                      |
| Chaturvedi;2007 | High                                                                                  | Low                                                                              | Low                                          | High                                              | Low                                              | Low                                     | Low                                                              | Low                                                         | Low                                                           | Low                                             | Moderate                                                     | LE2++                      |
| Chaturvedi;2007 | High                                                                                  | Low                                                                              | Low                                          | High                                              | Low                                              | Low                                     | Low                                                              | Low                                                         | Low                                                           | Low                                             | Moderate                                                     | LE2++                      |
| Dandge;2019     | High                                                                                  | Low                                                                              | Low                                          | High                                              | Low                                              | Low                                     | Low                                                              | Low                                                         | Low                                                           | Low                                             | Moderate                                                     | LE2++                      |
| Gabert;2017     | Low                                                                                   | Low                                                                              | Low                                          | High                                              | Low                                              | Low                                     | Low                                                              | Low                                                         | Low                                                           | Low                                             | Low                                                          | LE2++                      |
| Garcia;2022     | Low                                                                                   | High                                                                             | High                                         | High                                              | Low                                              | Low                                     | Low                                                              | Low                                                         | Low                                                           | Low                                             | Moderate                                                     | LE2                        |
| Geevar;2022     | High                                                                                  | Low                                                                              | Low                                          | Low                                               | Low                                              | Low                                     | Low                                                              | Low                                                         | Low                                                           | Low                                             | Low                                                          | LE2++                      |
| Godara;2021     | High                                                                                  | Low                                                                              | Low                                          | High                                              | Low                                              | Low                                     | Low                                                              | Low                                                         | Low                                                           | Low                                             | Moderate                                                     | LE2++                      |
| Goswami;2016    | High                                                                                  | Low                                                                              | Low                                          | Low                                               | Low                                              | Low                                     | Low                                                              | Low                                                         | Low                                                           | Low                                             | Low                                                          | LE2++                      |
| Gupta;2012      | Low                                                                                   | Low                                                                              | Low                                          | High                                              | Low                                              | Low                                     | Low                                                              | Low                                                         | Low                                                           | Low                                             | Low                                                          | LE2++                      |
| Gupta;2013      | Low                                                                                   | Low                                                                              | Low                                          | Low                                               | Low                                              | Low                                     | Low                                                              | Low                                                         | Low                                                           | Low                                             | Low                                                          | LE2++                      |

| Study         | Was the study's target population a close representation of the national population? | Was the sampling frame a true or close representation of the target population? | Was random selection used OR, a census used? | Was the likelihood of non-response bias minimal? | Were data collected directly from the subjects? | Was an acceptable case definition used? | Was the study instrument shown to have reliability and validity? | Was the same mode of data collection used for all subjects? | Was the length of the shortest prevalence period appropriate? | Were the numerator and denominator appropriate? | Summary item on the overall risk of study bias? <sup>1</sup> | SIGN 50 score <sup>2</sup> |
|---------------|--------------------------------------------------------------------------------------|---------------------------------------------------------------------------------|----------------------------------------------|--------------------------------------------------|-------------------------------------------------|-----------------------------------------|------------------------------------------------------------------|-------------------------------------------------------------|---------------------------------------------------------------|-------------------------------------------------|--------------------------------------------------------------|----------------------------|
| Gupta;2015    | Low                                                                                  | Low                                                                             | Low                                          | Low                                              | Low                                             | Low                                     | Low                                                              | Low                                                         | Low                                                           | Low                                             | Low                                                          | LE2++                      |
| Gupta;2020    | High                                                                                 | Low                                                                             | Low                                          | Low                                              | Low                                             | Low                                     | Low                                                              | Low                                                         | Low                                                           | Low                                             | Low                                                          | LE2++                      |
| Hazarika;2004 | High                                                                                 | Low                                                                             | Low                                          | Low                                              | Low                                             | Low                                     | Low                                                              | Low                                                         | Low                                                           | Low                                             | Low                                                          | LE2++                      |
| Kanungo;2017  | High                                                                                 | Low                                                                             | Low                                          | High                                             | Low                                             | Low                                     | Low                                                              | Low                                                         | Low                                                           | Low                                             | Moderate                                                     | LE2++                      |
| Kapoor;2021   | High                                                                                 | High                                                                            | High                                         | Low                                              | Low                                             | Low                                     | Low                                                              | Low                                                         | Low                                                           | Low                                             | High                                                         | LE2                        |
| Karmakar;2018 | High                                                                                 | Low                                                                             | Low                                          | High                                             | Low                                             | Low                                     | Low                                                              | Low                                                         | Low                                                           | Low                                             | Moderate                                                     | LE2++                      |
| Kaur;2012     | High                                                                                 | Low                                                                             | Low                                          | Low                                              | Low                                             | Low                                     | Low                                                              | Low                                                         | Low                                                           | Low                                             | Low                                                          | LE2++                      |
| Kaur;2016     | High                                                                                 | Low                                                                             | Low                                          | Low                                              | Low                                             | Low                                     | Low                                                              | Low                                                         | Low                                                           | Low                                             | Low                                                          | LE2++                      |
| Kharat;2021   | High                                                                                 | Low                                                                             | Low                                          | Low                                              | Low                                             | Low                                     | Low                                                              | Low                                                         | Low                                                           | Low                                             | Low                                                          | LE2++                      |
| Kusuma;2013   | High                                                                                 | Low                                                                             | Low                                          | High                                             | Low                                             | Low                                     | Low                                                              | Low                                                         | Low                                                           | Low                                             | Moderate                                                     | LE2++                      |
| Lee;2022      | Low                                                                                  | Low                                                                             | Low                                          | Low                                              | Low                                             | Low                                     | Low                                                              | Low                                                         | Low                                                           | Low                                             | Low                                                          | LE2++                      |
| Mallik;2014   | High                                                                                 | Low                                                                             | Low                                          | Low                                              | Low                                             | Low                                     | Low                                                              | Low                                                         | Low                                                           | Low                                             | Low                                                          | LE2++                      |
| Mini;2020     | High                                                                                 | Low                                                                             | Low                                          | High                                             | Low                                             | Low                                     | Low                                                              | Low                                                         | Low                                                           | Low                                             | Moderate                                                     | LE2++                      |
| Misra;2014    | High                                                                                 | Low                                                                             | Low                                          | Low                                              | Low                                             | Low                                     | Low                                                              | Low                                                         | Low                                                           | Low                                             | Low                                                          | LE2++                      |
| Mohan;2007    | High                                                                                 | Low                                                                             | Low                                          | Low                                              | Low                                             | Low                                     | Low                                                              | Low                                                         | Low                                                           | Low                                             | Low                                                          | LE2++                      |
| Moser;2014    | High                                                                                 | Low                                                                             | Low                                          | Low                                              | Low                                             | Low                                     | Low                                                              | Low                                                         | Low                                                           | Low                                             | Low                                                          | LE2++                      |
| Patil;2021    | Low                                                                                  | Low                                                                             | Low                                          | Low                                              | Low                                             | Low                                     | Low                                                              | Low                                                         | Low                                                           | Low                                             | Low                                                          | LE2++                      |
| Prayag;2017   | High                                                                                 | Low                                                                             | Low                                          | Low                                              | Low                                             | Low                                     | Low                                                              | Low                                                         | Low                                                           | Low                                             | Low                                                          | LE2++                      |
| Prenissl;2019 | Low                                                                                  | Low                                                                             | Low                                          | High                                             | Low                                             | Low                                     | Low                                                              | Low                                                         | Low                                                           | Low                                             | Low                                                          | LE2++                      |
| Ragavan;2021  | High                                                                                 | Low                                                                             | Low                                          | High                                             | Low                                             | Low                                     | Low                                                              | Low                                                         | Low                                                           | Low                                             | Moderate                                                     | LE2++                      |
| Reddy;2018    | High                                                                                 | Low                                                                             | Low                                          | High                                             | Low                                             | Low                                     | Low                                                              | Low                                                         | Low                                                           | Low                                             | Moderate                                                     | LE2++                      |
| Roy;2017      | High                                                                                 | Low                                                                             | Low                                          | Low                                              | Low                                             | Low                                     | Low                                                              | Low                                                         | Low                                                           | Low                                             | Low                                                          | LE2++                      |
| Sandhya;2018  | High                                                                                 | Low                                                                             | Low                                          | High                                             | Low                                             | Low                                     | Low                                                              | Low                                                         | Low                                                           | Low                                             | Moderate                                                     | LE2++                      |

| Study          | Was the study's target population a close representation of the national population? | Was the sampling frame a true or close representation of the target population? | Was random selection used OR, a census used? | Was the likelihood of non-response bias minimal? | Were data collected directly from the subjects? | Was an acceptable case definition used? | Was the study instrument shown to have reliability and validity? | Was the same mode of data collection used for all subjects? | Was the length of the shortest prevalence period appropriate? | Were the numerator and denominator appropriate? | Summary item on the overall risk of study bias? <sup>1</sup> | SIGN 50 score <sup>2</sup> |
|----------------|--------------------------------------------------------------------------------------|---------------------------------------------------------------------------------|----------------------------------------------|--------------------------------------------------|-------------------------------------------------|-----------------------------------------|------------------------------------------------------------------|-------------------------------------------------------------|---------------------------------------------------------------|-------------------------------------------------|--------------------------------------------------------------|----------------------------|
| Sathish;2012   | High                                                                                 | Low                                                                             | Low                                          | Low                                              | Low                                             | Low                                     | Low                                                              | Low                                                         | Low                                                           | Low                                             | Low                                                          | LE2++                      |
| Saxena;2021    | High                                                                                 | Low                                                                             | Low                                          | Low                                              | Low                                             | Low                                     | Low                                                              | Low                                                         | Low                                                           | Low                                             | Low                                                          | LE2++                      |
| Thakur;2022a   | High                                                                                 | Low                                                                             | Low                                          | Low                                              | Low                                             | Low                                     | Low                                                              | Low                                                         | Low                                                           | Low                                             | Low                                                          | LE2++                      |
| Thakur;2022b   | High                                                                                 | Low                                                                             | Low                                          | Low                                              | Low                                             | Low                                     | Low                                                              | Low                                                         | Low                                                           | Low                                             | Low                                                          | LE2++                      |
| Thankappan;200 | High                                                                                 | Low                                                                             | Low                                          | Low                                              | Low                                             | Low                                     | Low                                                              | Low                                                         | Low                                                           | Low                                             | Low                                                          | LE2++                      |
| Tripathy;2017  | High                                                                                 | Low                                                                             | Low                                          | Low                                              | Low                                             | Low                                     | Low                                                              | Low                                                         | Low                                                           | Low                                             | Low                                                          | LE2++                      |
| Veena;2019     | High                                                                                 | Low                                                                             | Low                                          | High                                             | Low                                             | Low                                     | Low                                                              | Low                                                         | Low                                                           | Low                                             | Moderate                                                     | LE2++                      |
| Yadav;2008     | High                                                                                 | Low                                                                             | Low                                          | Low                                              | Low                                             | Low                                     | Low                                                              | Low                                                         | Low                                                           | Low                                             | Low                                                          | LE2++                      |

<sup>1</sup>Hoy et al: Hoy D, Brooks P, Woolf A, et al. Assessing risk of bias in prevalence studies: modification of an existing tool and evidence of interrater agreement. *Journal of Clinical Epidemiology*. 2012;65(9):934-939. doi:10.1016/j.jclinepi.2011.11.014

<sup>2</sup>de Winter CF, Jansen AAC, Evenhuis HM. Physical conditions and challenging behaviour in people with intellectual disability: a systematic review. *Journal of Intellectual Disability Research*. 2011;55(7):675-698. doi:10.1111/j.1365-2788.2011.01390.x

S8 Forest plots showing sub-group analysis across region, study period and sex.

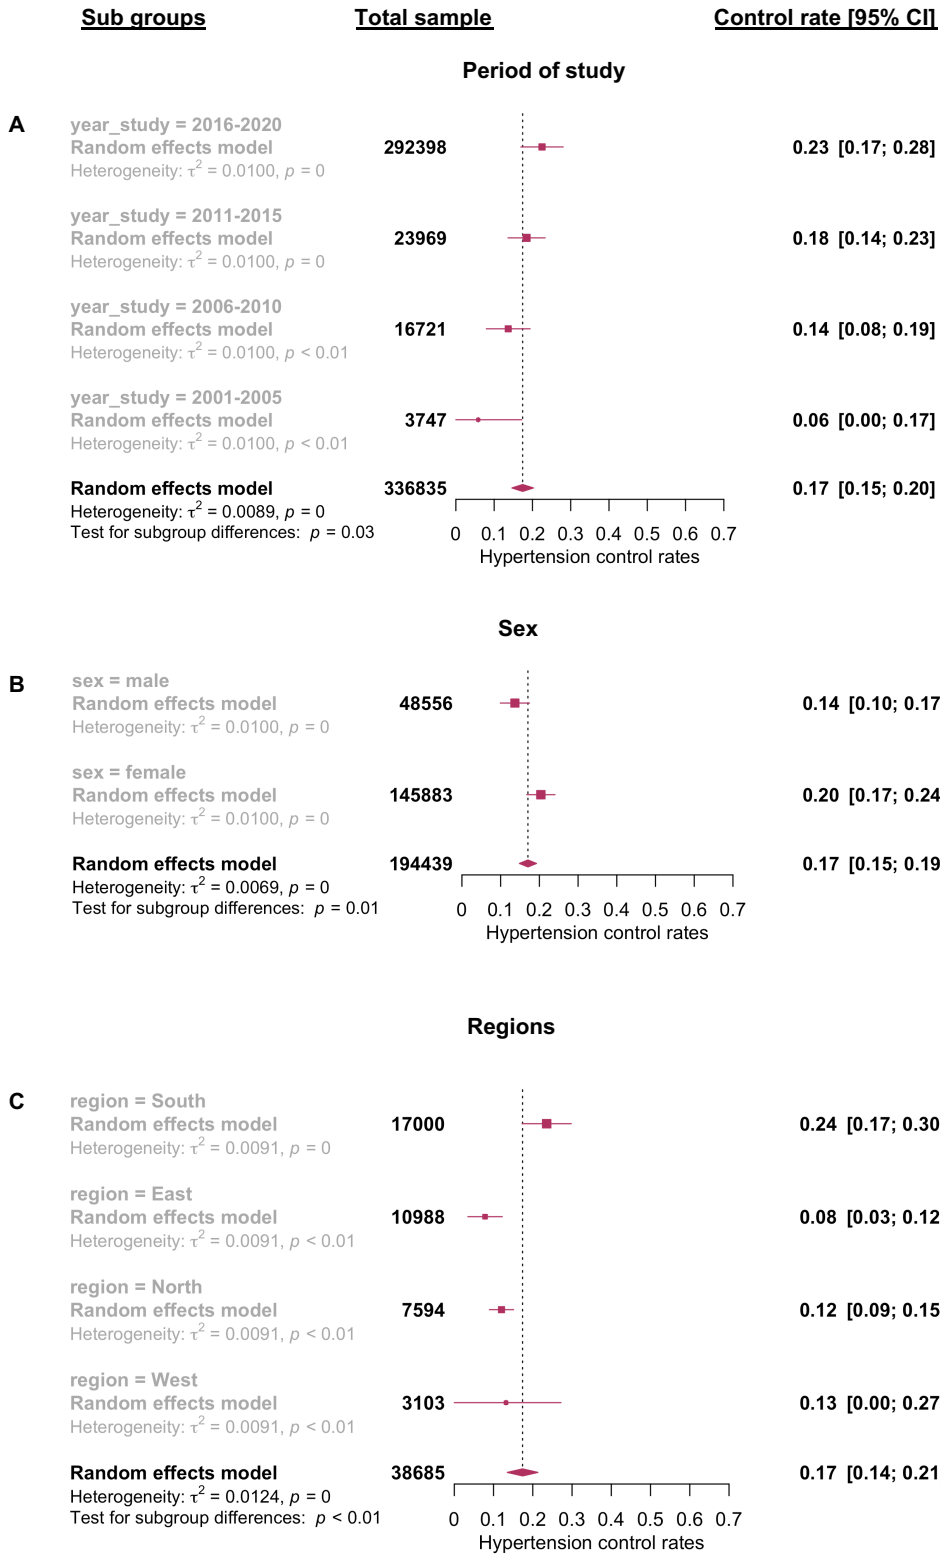

**S9 Hypertension control rates in India, 2001-2020: meta-regression model**

|                                     | <b>Effect estimate</b><br><i>(difference in control rate)</i> | <b>95% CI</b> | <b>p-value</b>    |
|-------------------------------------|---------------------------------------------------------------|---------------|-------------------|
| Intercept                           | 2.9                                                           | -4.5,10.4     | 0.43              |
| <i>Sex (Ref: Female)</i>            |                                                               |               |                   |
| Male                                | -7.3                                                          | -11.5,-3.1    | <b>&lt;0.001</b>  |
| <i>Region (Ref: East)</i>           |                                                               |               |                   |
| North                               | 2.7                                                           | -4.8,10.2     | 0.47              |
| South                               | 14.2                                                          | 7.2,21.1      | <b>&lt;.0001</b>  |
| West                                | 4.8                                                           | -3.4,13.1     | 0.25              |
| <i>Time period (Ref: 2001-2005)</i> |                                                               |               |                   |
| 2006-2010                           | 2.7                                                           | -5.6,10.9     | 0.52              |
| 2011-2015                           | 13.4                                                          | 6.7,20.1      | <b>&lt;0.0001</b> |
| 2016-2020                           | 14.7                                                          | 6.9,22.5      | <b>&lt;0.001</b>  |

*CI: Confidence interval*

**S10—A**

**Result of sensitivity analysis: after excluding studies with data only on elderly**

Number of studies combined:  $k = 39$   
Number of observations:  $o = 333747$   
Number of events:  $e = 53384$

|                      | proportion | 95%-CI           |
|----------------------|------------|------------------|
| Common effect model  | 0.1209     | [0.1199; 0.1220] |
| Random effects model | 0.1757     | [0.1401; 0.2114] |
| Prediction interval  |            | [0.0000; 0.3706] |

Quantifying heterogeneity:  $\tau^2 = 0.0090$  [0.0049; 0.0197];  $\tau = 0.0949$  [0.0701; 0.1403]  
 $I^2 = 99.8\%$ ;  $H = 22.89$

| Test of heterogeneity: | Q        | d.f. | p-value |
|------------------------|----------|------|---------|
|                        | 19917.56 | 38   | 0       |

**S10—B**

**Result of sensitivity analysis: with only studies with low risk of bias (*Hoy et al*)**

Number of studies combined:  $k = 33$   
Number of observations:  $o = 324335$   
Number of events:  $e = 51379$

|                      | proportion | 95%-CI           |
|----------------------|------------|------------------|
| Common effect model  | 0.1219     | [0.1208; 0.1230] |
| Random effects model | 0.1534     | [0.1224; 0.1845] |
| Prediction interval  |            | [0.0000; 0.3476] |

Quantifying heterogeneity:  
 $\tau^2 = 0.0088$  [0.0037; 0.0163];  $\tau = 0.0937$  [0.0609; 0.1277]  
 $I^2 = 99.8\%$ ;  $H = 23.65$

| Test of heterogeneity: | Q        | d.f. | p-value |
|------------------------|----------|------|---------|
|                        | 17903.02 | 32   | 0       |
